# Supplementary material for: Developments in marine invertebrate primary culture reveal novel cell morphologies in the model bivalve Crassostrea gigas
Source: PeerJ. 2020 Jun 1;8:e9180. doi: 10.7717/peerj.9180 (PMC7271890; doi:10.7717/peerj.9180)
Supplement: Data S2 [file peerj-08-9180-s005.xlsx]

## Sheet: Sheet1
sample (0d)	rna conc (ng/ul)	0d r7 Ct		sample (1d)	rna conc (ng/ul)	1d r7 Ct		sample (2d)	rna conc (ng/ul)	2d r7 Ct		sample (5d)	rna conc (ng/ul)	5d EF1a Ct	5d r18 Ct	5d r7 Ct		sample (9d)	rna conc (ng/ul)	9d r7 Ct
h1a	2327	24.62		h1a		26.77		h1a	18	21.51		h1a	20					h1a		25.44
h1b	1358	18.37		h1b		20.28		h1b				h1b	77	29.55	33.31	27.09		h1b		28.62
h1c	1025	24		h1c		24.68		h1c	28			h1c	87	35.75	30.35	31.02		h1c		29.72
h2a	69	18.54		h2a		21.46		h2a				h2a	95					h2a		26.58
h2b	399	14.3		h2b				h2b	13			h2b	158					h2b		25.48
h2c	471	16.12		h2c		32.17		h2c	34			h2c	38					h2c
h3a	66	19.02		h3a		36.96		h3a	3			h3a	51					h3a		25.03
h3b	649	18.59		h3b		25.45		h3b	10			h3b	48					h3b		37.73
h3c	1486	23.61		h3c		23.39		h3c	14			h3c	109	27.82	29.8	25.66		h3c		26.2
mu1a	27	19.25		mu1a	69	21.72		mu1a	63			mu1a	28			39		mu1a	17
mu1b	326	17.63		mu1b	91	26.06		mu1b	22			mu1b	18	30.92	38.16			mu1b	53	36.35
mu1c	161	15.7		mu1c	33	27.14		mu1c	19			mu1c	28					mu1c	54	26.39
mu2a	174	16.6		mu2a	71	26.64		mu2a	27			mu2a	65	24.36	24.05	29.08		mu2a	64	34.8
mu2b	197	15.79		mu2b	41	29.92		mu2b	122			mu2b	125	35.08		39.58		mu2b	107	29.46
mu2c	80	17.13		mu2c	72	24.51		mu2c	33			mu2c	58					mu2c	98	25.53
mu3a	340	15.82		mu3a	10	23.82		mu3a	33			mu3a	63					mu3a	100	37.19
mu3b	250	17.43		mu3b	183	20.32		mu3b	54			mu3b	169					mu3b	115
mu3c	247	20.22		mu3c	54	23		mu3c	148			mu3c	141			30.05		mu3c	45	38.43
g1a	665	18.07		g1a	38	22.35		g1a	65			g1a	124	15.84	16.35	15.75		g1a	56	29.81
g1b	305	15.97		g1b	27	23.64		g1b	25			g1b	102	16.84	20.54	27.34		g1b	115	27.97
g1c	1171	9.85		g1c	31	23.34		g1c	66			g1c	112	16.72	20.32	20.58		g1c	103	29.45
g2a	772	11.14		g2a	27	21.24		g2a	34			g2a	126		27.31	22.88		g2a	124	20.31
g2b	313	17.62		g2b	5	21.02		g2b	23			g2b	5	20.15	21.86	20.55		g2b	102	26.15
g2c	178	10.8		g2c	14	21.23		g2c	16			g2c	20	21.85	22.81	21.92		g2c	97	31.79
g3a	741	20.29		g3a	20	22.22		g3a	8			g3a	44	22.71	20.07	19.47		g3a	44	32.63
g3b	977	15.04		g3b	49	21.1		g3b	22			g3b	166	15.59	17.49	16.68		g3b	51	23.39
g3c	378	14.4		g3c	26	23.21		g3c	43			g3c	59	21.18	23.06	22.36		g3c	58	19.24
mt1a	406	16.33		mt1a	27	24.84		mt1a	21			mt1a	68	16.36	17.68	17.1		mt1a	103	23.21
mt1b	244	16.57		mt1b	30	22.52		mt1b	6			mt1b	134	16.34	17.4	21.26		mt1b	147	20.93
mt1c	1051	22.98		mt1c	24	22.19		mt1c	28			mt1c	117	36.79	20.07	34.82		mt1c	59	22.31
mt2a	269	28.71		mt2a	93	19.77		mt2a	114			mt2a	97	25.83	25.03	32.01		mt2a	112	23.35
mt2b	374	15.48		mt2b	106	23.58		mt2b	34			mt2b	132					mt2b	86	24.88
mt2c	542	14.71		mt2c	100	21.45		mt2c	135			mt2c	152		36.94	28.19		mt2c	158	22.41
mt3a	5	17.9		mt3a	21	22.69		mt3a	70			mt3a	120	35.68	34.1	28.35		mt3a	156	27.72
mt3b	647	11.31		mt3b	29	21.89		mt3b	21			mt3b	47	34.63	31.98	28.86		mt3b	122	22.48
mt3c	708	18.04		mt3c	39	24.73		mt3c	21			mt3c	74	29.21	21.07	19.9		mt3c	131	26.12
